# Supplementary material for: Cellular uptake of drug loaded spider silk particles
Source: Royal Society of Chemistry journal article supplement (doi:10.1039/c6bm00435k), 2016-01-01
Supplement: c6bm00435k1.pdf [file c6bm00435k1.pdf]

## Cellular uptake of drug loaded spider silk particles

Martina B. Schierling<sup>a\*</sup>, Elena Doblhofer<sup>a\*</sup>, Thomas Scheibel<sup>a-</sup>

### Supplementary Information

**Table S 1:** Loading efficiency of different protein particles upon incubation with 0.4 nmol of the corresponding model substance FI-ODN or PEI-FI per mg particle

| Protein particle           | Uptake efficiency FI-ODN | Uptake efficiency PEI-FI |
|----------------------------|--------------------------|--------------------------|
|                            | / %                      | / %                      |
| eADF4(C16)                 | -                        | 26.6 ± 0.4               |
| eADF4(C16)RGD              | -                        | 26.9 ± 0.4               |
| eADF4(C16)R <sub>8</sub> G | -                        | 23.6 ± 0.3               |
| eADF4( $\kappa$ 16)        | 40.6 ± 0.3               | -                        |

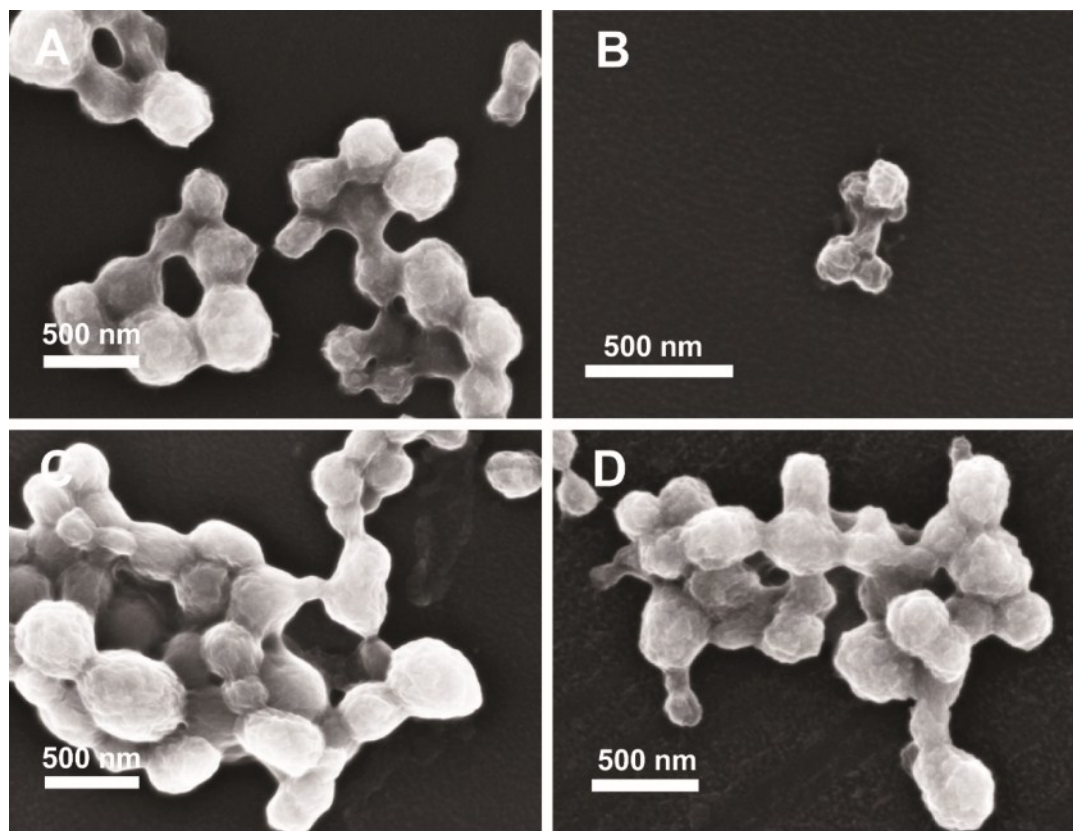

**Fig. S 1** SEM Images of spider silk protein particles in dry state, A) eADF4(C16), B) eADF4(C16)R<sub>8</sub>G, C) eADF4(C16)RGD, and D) eADF4( $\kappa$ 16). Particles were produced after resuspending the respective protein in EMiM[acetate] followed by potassium phosphate precipitation. SEM images were taken at an accelerating voltage of 3 kV. Before imaging, the particles were air dried and sputtered with platinum.

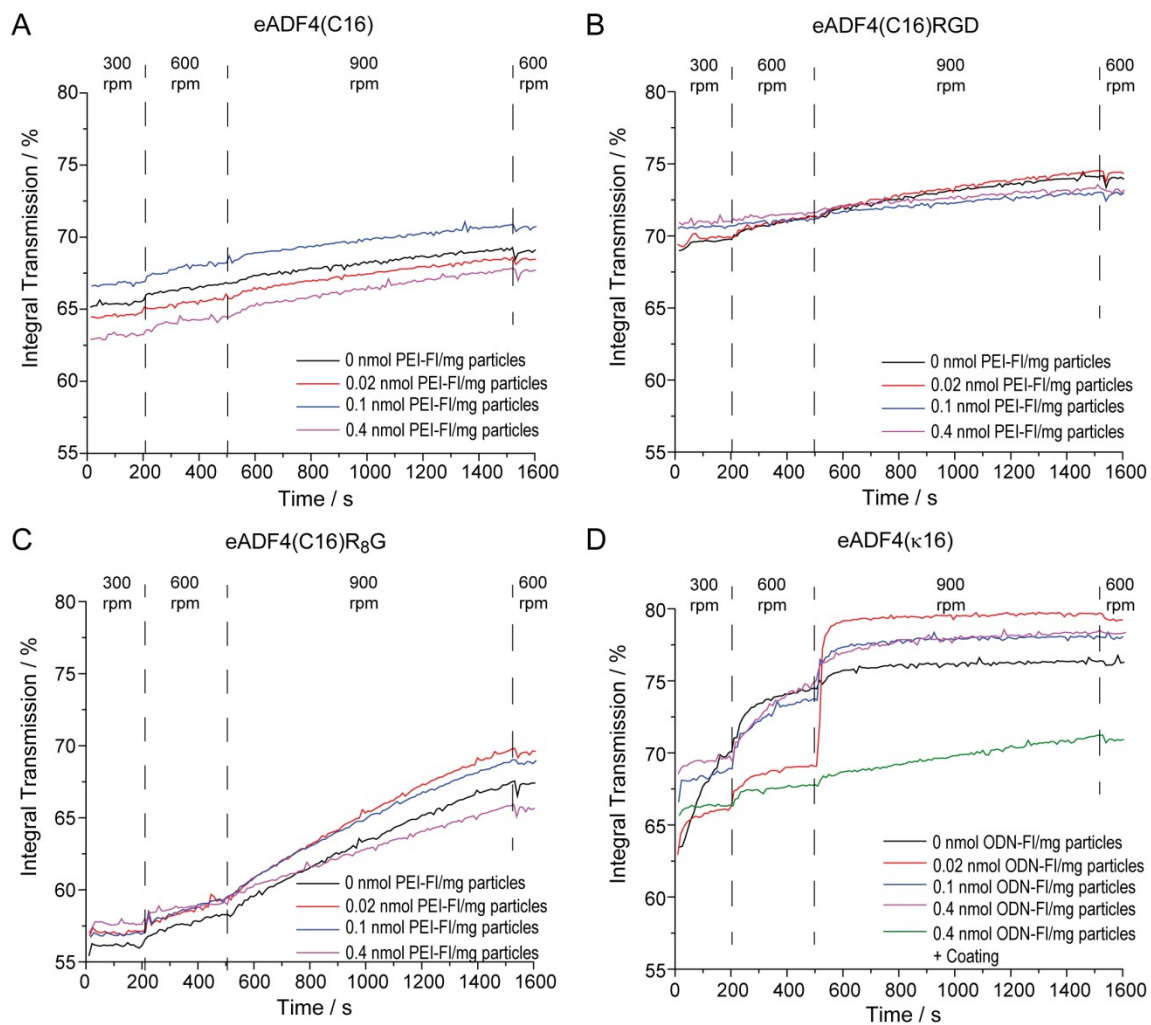

**Fig. S 2** Representative sedimentation curves of spider silk and PEI-FI or FI-ODN loaded spider silk particles prepared from a  $2 \text{ mg ml}^{-1}$  solution in EMim[acetate] and analyzed at a concentration of  $1.25 \text{ mg ml}^{-1}$ , measured at an ionic strength of  $12 \text{ mM}$  ( $1/11 \text{ PBS}$ ) and  $\text{pH } 7.4$ . The single graphs show (A) eADF4(C16) particles, (B) eADF4(C16)RGD particles, (C) eADF4(C16)R<sub>8</sub>G and (D) eADF4( $\kappa$ 16) particles, each in the absence and presence model drug as indicated.
